# Supplementary material for: “Thermal escape” of MTNP: the phase separation of CL-20/MTNP cocrystals under long-term heating
Source: Royal Society of Chemistry journal article supplement (doi:10.1039/d2cp04822a), 2022-12-07
Supplement: d2cp04822a1.pdf [file d2cp04822a1.pdf]

## Supporting Information

### “Thermal Escape” of MTNP: The Phase Separation of CL-20/MTNP Cocrystal Under Long-Term Heating

Fang Yang,<sup>†</sup> Zongwei Yang,<sup>†</sup> Qian Yu,<sup>†</sup> Gang Li,<sup>†</sup> Chuande Zhao,<sup>\*,†</sup> and Yong  
Tian<sup>\*,†</sup>

<sup>†</sup>Institute of Chemical Materials, China Academy of Engineering Physics (CAEP),

P.O. Box 919-311, Mianyang, Sichuan 621999, China

#### **\*Corresponding author**

Prof. Chuande Zhao

Email: [c.d.zhao@caep.cn](mailto:c.d.zhao@caep.cn)

Prof. Yong Tian

Email: [tianyong@caep.cn](mailto:tianyong@caep.cn)

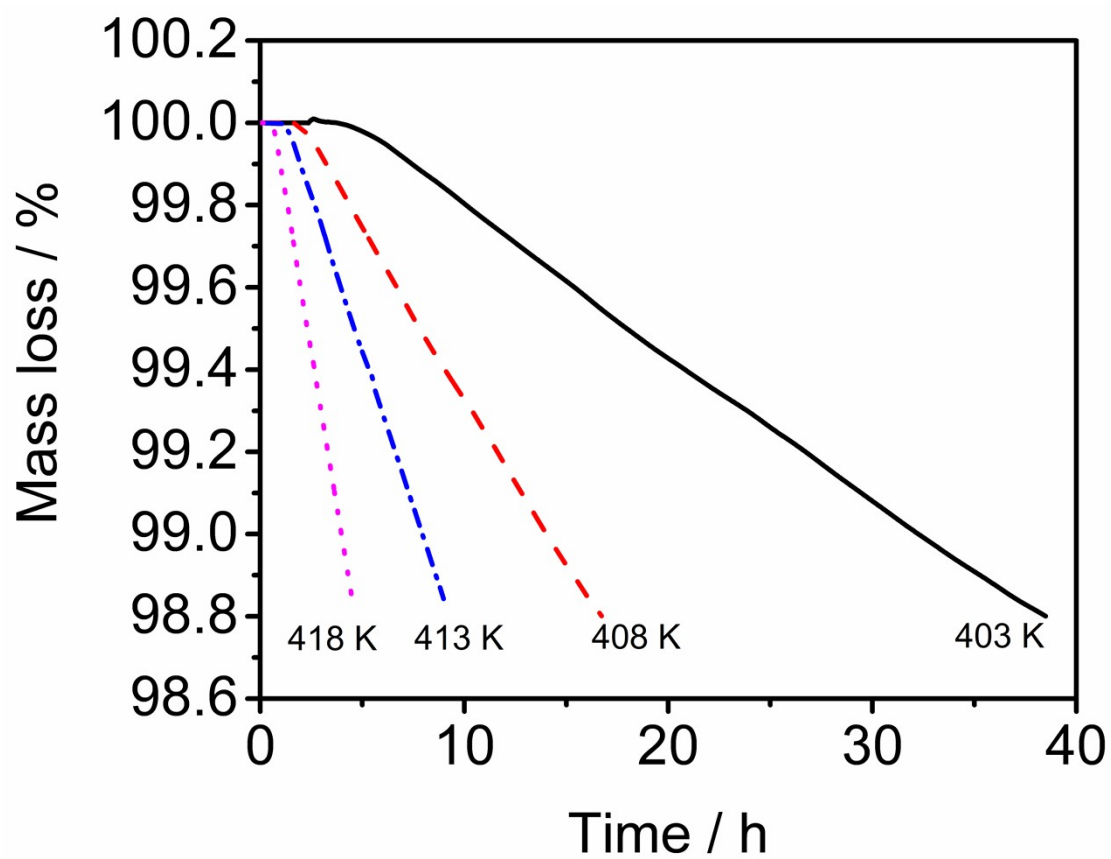

**Figure S1.** The thermograms of CL-20/MTNP cocrystal at holding temperatures of 403 K, 408 K, 413 K, and 418 K.

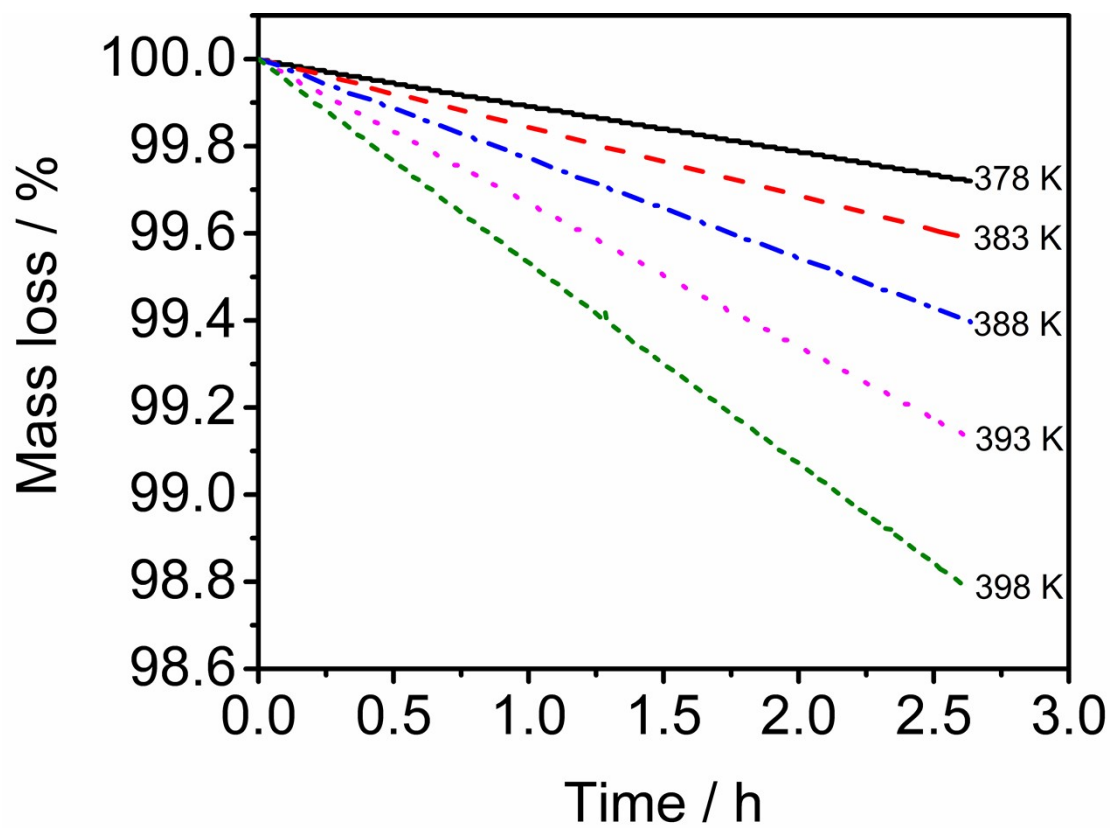

**Figure S2.** The thermograms of MTNP at holding temperatures of 378 K, 383 K, 388 K, 393 K and 398 K.
